# Supplementary material for: Identification of crucial genes based on expression profiles of hepatocellular carcinomas by bioinformatics analysis
Source: PeerJ. 2019 Aug 8;7:e7436. doi: 10.7717/peerj.7436 (PMC6689388; doi:10.7717/peerj.7436)
Supplement: Table S8 [file peerj-07-7436-s009.csv]

	2 modules of PPI network									module 1
module 1										GOID	GOTerm	Ontology Source	Term PValue	Term PValue Corrected with Bonferroni step down	Group PValue	Group PValue Corrected with Bonferroni step down	GOLevels	GOGroups	% Associated Genes	Nr. Genes	Associated Genes Found
SUID	MCODE_Cluster	MCODE_Node_Status	MCODE_Score	name	selected	shared name				R-HSA:983189	Kinesins	REACTOME_Pathways_04.09.2018	0.00	0.00	0.00	0.00	[-1]	Group0	5.08	3.00	[KIF20A, KIF4A, RACGAP1]
127	Cluster 1	Clustered	32	NCAPG	FALSE	NCAPG				R-HSA:141424	Amplification of signal from the kinetochores	REACTOME_Pathways_04.09.2018	0.00	0.00	0.00	0.00	[-1]	Group1	11.46	11.00	[BIRC5, BUB1, BUB1B, CDC20, CENPF, CENPK, CENPU, MAD2L1, NDC80, NUF2, ZWINT]
125	Cluster 1	Clustered	32	KIF14	FALSE	KIF14				R-HSA:141444	Amplification of signal from unattached kinetochores via a MAD2 inhibitory signal	REACTOME_Pathways_04.09.2018	0.00	0.00	0.00	0.00	[-1]	Group1	11.46	11.00	[BIRC5, BUB1, BUB1B, CDC20, CENPF, CENPK, CENPU, MAD2L1, NDC80, NUF2, ZWINT]
124	Cluster 1	Clustered	32	PRC1	FALSE	PRC1				R-HSA:195258	RHO GTPase Effectors	REACTOME_Pathways_04.09.2018	0.00	0.00	0.00	0.00	[-1]	Group1	4.09	13.00	[BIRC5, BUB1, BUB1B, CDC20, CENPF, CENPK, CENPU, KIF14, MAD2L1, NDC80, NUF2, PRC1, ZWINT]
120	Cluster 1	Clustered	32	RRM2	FALSE	RRM2				R-HSA:2467813	Separation of Sister Chromatids	REACTOME_Pathways_04.09.2018	0.00	0.00	0.00	0.00	[-1]	Group1	5.79	11.00	[BIRC5, BUB1, BUB1B, CDC20, CENPF, CENPK, CENPU, MAD2L1, NDC80, NUF2, ZWINT]
118	Cluster 1	Clustered	32	KIF20A	FALSE	KIF20A				R-HSA:2500257	Resolution of Sister Chromatid Cohesion	REACTOME_Pathways_04.09.2018	0.00	0.00	0.00	0.00	[-1]	Group1	11.11	14.00	[BIRC5, BUB1, BUB1B, CCNB1, CCNB2, CDC20, CDK1, CENPF, CENPK, CENPU, MAD2L1, NDC80, NUF2, ZWINT]
112	Cluster 1	Clustered	32	ECT2	FALSE	ECT2				R-HSA:2555396	Mitotic Metaphase and Anaphase	REACTOME_Pathways_04.09.2018	0.00	0.00	0.00	0.00	[-1]	Group1	5.45	11.00	[BIRC5, BUB1, BUB1B, CDC20, CENPF, CENPK, CENPU, MAD2L1, NDC80, NUF2, ZWINT]
111	Cluster 1	Clustered	32	RACGAP1	FALSE	RACGAP1				R-HSA:5663220	RHO GTPases Activate Formins	REACTOME_Pathways_04.09.2018	0.00	0.00	0.00	0.00	[-1]	Group1	7.86	11.00	[BIRC5, BUB1, BUB1B, CDC20, CENPF, CENPK, CENPU, MAD2L1, NDC80, NUF2, ZWINT]
748	Cluster 1	Clustered	27.93563218	FAM83D	FALSE	FAM83D				R-HSA:68877	Mitotic Prometaphase	REACTOME_Pathways_04.09.2018	0.00	0.00	0.00	0.00	[-1]	Group1	8.00	16.00	[BIRC5, BUB1, BUB1B, CCNB1, CCNB2, CDC20, CDK1, CENPF, CENPK, CENPU, MAD2L1, NCAPG, NDC80, NEK2, NUF2, ZWINT]
108	Cluster 1	Clustered	32	ZWINT	FALSE	ZWINT				R-HSA:68882	Mitotic Anaphase	REACTOME_Pathways_04.09.2018	0.00	0.00	0.00	0.00	[-1]	Group1	5.47	11.00	[BIRC5, BUB1, BUB1B, CDC20, CENPF, CENPK, CENPU, MAD2L1, NDC80, NUF2, ZWINT]
745	Cluster 1	Clustered	31	HELLS	FALSE	HELLS				R-HSA:68886	M Phase	REACTOME_Pathways_04.09.2018	0.00	0.00	0.00	0.00	[-1]	Group1	4.30	17.00	[BIRC5, BUB1, BUB1B, CCNB1, CCNB2, CDC20, CDK1, CENPF, CENPK, CENPU, KIF20A, MAD2L1, NCAPG, NDC80, NEK2, NUF2, ZWINT]
105	Cluster 1	Clustered	32	NEK2	FALSE	NEK2				R-HSA:69618	Mitotic Spindle Checkpoint	REACTOME_Pathways_04.09.2018	0.00	0.00	0.00	0.00	[-1]	Group1	9.82	11.00	[BIRC5, BUB1, BUB1B, CDC20, CENPF, CENPK, CENPU, MAD2L1, NDC80, NUF2, ZWINT]
680	Cluster 1	Clustered	30	UBE2T	FALSE	UBE2T				R-HSA:69620	Cell Cycle Checkpoints	REACTOME_Pathways_04.09.2018	0.00	0.00	0.00	0.00	[-1]	Group1	4.78	14.00	[BIRC5, BUB1, BUB1B, CCNB1, CCNB2, CDC20, CDK1, CENPF, CENPK, CENPU, MAD2L1, NDC80, NUF2, ZWINT]
357	Cluster 1	Clustered	30	EZH2	FALSE	EZH2				KEGG:04110	Cell cycle	KEGG_04.09.2018	0.00	0.00	0.00	0.00	[-1]	Group2	6.45	8.00	[BUB1, BUB1B, CCNB1, CCNB2, CDC20, CDK1, MAD2L1, TTK]
547	Cluster 1	Seed	32	RAD51AP1	FALSE	RAD51AP1				KEGG:04114	Oocyte meiosis	KEGG_04.09.2018	0.00	0.00	0.00	0.00	[-1]	Group2	4.84	6.00	[BUB1, CCNB1, CCNB2, CDC20, CDK1, MAD2L1]
163	Cluster 1	Clustered	32	HMMR	FALSE	HMMR				KEGG:04115	p53 signaling pathway	KEGG_04.09.2018	0.00	0.00	0.00	0.00	[-1]	Group2	5.56	4.00	[CCNB1, CCNB2, CDK1, RRM2]
99	Cluster 1	Clustered	32	BIRC5	FALSE	BIRC5				KEGG:04914	Progesterone-mediated oocyte maturation	KEGG_04.09.2018	0.00	0.00	0.00	0.00	[-1]	Group2	5.05	5.00	[BUB1, CCNB1, CCNB2, CDK1, MAD2L1]
226	Cluster 1	Clustered	32	NUSAP1	FALSE	NUSAP1				R-HSA:141405	Inhibition of the proteolytic activity of APC/C required for the onset of anaphase by mitotic spindle checkpoint components	REACTOME_Pathways_04.09.2018	0.00	0.00	0.00	0.00	[-1]	Group2	15.00	3.00	[BUB1B, CDC20, MAD2L1]
96	Cluster 1	Clustered	32	TTK	FALSE	TTK				R-HSA:141430	Inactivation of APC/C via direct inhibition of the APC/C complex	REACTOME_Pathways_04.09.2018	0.00	0.00	0.00	0.00	[-1]	Group2	15.00	3.00	[BUB1B, CDC20, MAD2L1]
476	Cluster 1	Clustered	32	DTL	FALSE	DTL				R-HSA:156711	Polo-like kinase mediated events	REACTOME_Pathways_04.09.2018	0.00	0.00	0.00	0.00	[-1]	Group2	18.75	3.00	[CCNB1, CCNB2, CENPF]
156	Cluster 1	Clustered	32	KIF4A	FALSE	KIF4A				R-HSA:162658	Golgi Cisternae Pericentriolar Stack Reorganization	REACTOME_Pathways_04.09.2018	0.00	0.00	0.00	0.00	[-1]	Group2	21.43	3.00	[CCNB1, CCNB2, CDK1]
214	Cluster 1	Clustered	32	CDKN3	FALSE	CDKN3				R-HSA:174048	APC/C:Cdc20 mediated degradation of Cyclin B	REACTOME_Pathways_04.09.2018	0.00	0.00	0.00	0.00	[-1]	Group2	13.04	3.00	[CCNB1, CDC20, CDK1]
86	Cluster 1	Clustered	32	BUB1B	FALSE	BUB1B				R-HSA:174143	APC/C-mediated degradation of cell cycle proteins	REACTOME_Pathways_04.09.2018	0.00	0.00	0.00	0.00	[-1]	Group2	6.98	6.00	[BUB1B, CCNB1, CDC20, CDK1, MAD2L1, NEK2]
84	Cluster 1	Clustered	32	MAD2L1	FALSE	MAD2L1				R-HSA:174184	Cdc20:Phospho-APC/C mediated degradation of Cyclin A	REACTOME_Pathways_04.09.2018	0.00	0.00	0.00	0.00	[-1]	Group2	5.56	4.00	[BUB1B, CDC20, CDK1, MAD2L1]
339	Cluster 1	Clustered	32	ANLN	FALSE	ANLN				R-HSA:176408	Regulation of APC/C activators between G1/S and early anaphase	REACTOME_Pathways_04.09.2018	0.00	0.00	0.00	0.00	[-1]	Group2	6.25	5.00	[BUB1B, CCNB1, CDC20, CDK1, MAD2L1]
82	Cluster 1	Clustered	32	BUB1	FALSE	BUB1				R-HSA:176409	APC/C:Cdc20 mediated degradation of mitotic proteins	REACTOME_Pathways_04.09.2018	0.00	0.00	0.00	0.00	[-1]	Group2	8.00	6.00	[BUB1B, CCNB1, CDC20, CDK1, MAD2L1, NEK2]
785	Cluster 1	Clustered	26	E2F8	FALSE	E2F8				R-HSA:176417	Phosphorylation of Emi1	REACTOME_Pathways_04.09.2018	0.00	0.00	0.00	0.00	[-1]	Group2	50.00	3.00	[CCNB1, CDC20, CDK1]
273	Cluster 1	Clustered	32	DLGAP5	FALSE	DLGAP5				R-HSA:176814	Activation of APC/C and APC/C:Cdc20 mediated degradation of mitotic proteins	REACTOME_Pathways_04.09.2018	0.00	0.00	0.00	0.00	[-1]	Group2	7.89	6.00	[BUB1B, CCNB1, CDC20, CDK1, MAD2L1, NEK2]
145	Cluster 1	Clustered	32	TOP2A	FALSE	TOP2A				R-HSA:179409	APC-Cdc20 mediated degradation of Nek2A	REACTOME_Pathways_04.09.2018	0.00	0.00	0.00	0.00	[-1]	Group2	16.00	4.00	[BUB1B, CDC20, MAD2L1, NEK2]
80	Cluster 1	Clustered	32	NDC80	FALSE	NDC80				R-HSA:179419	APC:Cdc20 mediated degradation of cell cycle proteins prior to satisfation of the cell cycle checkpoint	REACTOME_Pathways_04.09.2018	0.00	0.00	0.00	0.00	[-1]	Group2	6.85	5.00	[BUB1B, CDC20, CDK1, MAD2L1, NEK2]
79	Cluster 1	Clustered	32	NUF2	FALSE	NUF2				R-HSA:2514853	Condensation of Prometaphase Chromosomes	REACTOME_Pathways_04.09.2018	0.00	0.00	0.00	0.00	[-1]	Group2	36.36	4.00	[CCNB1, CCNB2, CDK1, NCAPG]
333	Cluster 1	Clustered	32	ASPM	FALSE	ASPM				R-HSA:2565942	Regulation of PLK1 Activity at G2/M Transition	REACTOME_Pathways_04.09.2018	0.00	0.00	0.00	0.00	[-1]	Group2	4.55	4.00	[CCNB1, CCNB2, CDK1, NEK2]
77	Cluster 1	Clustered	32	CCNB1	FALSE	CCNB1				R-HSA:2980766	Nuclear Envelope Breakdown	REACTOME_Pathways_04.09.2018	0.00	0.00	0.00	0.00	[-1]	Group2	5.88	3.00	[CCNB1, CCNB2, CDK1]
140	Cluster 1	Clustered	27.87126437	CENPK	FALSE	CENPK				R-HSA:2980767	Activation of NIMA Kinases NEK9, NEK6, NEK7	REACTOME_Pathways_04.09.2018	0.00	0.00	0.00	0.00	[-1]	Group2	42.86	3.00	[CCNB1, CCNB2, CDK1]
139	Cluster 1	Clustered	32	MLF1IP	FALSE	MLF1IP				R-HSA:3301854	Nuclear Pore Complex (NPC) Disassembly	REACTOME_Pathways_04.09.2018	0.00	0.00	0.00	0.00	[-1]	Group2	8.82	3.00	[CCNB1, CCNB2, CDK1]
75	Cluster 1	Clustered	32	CCNB2	FALSE	CCNB2				R-HSA:453276	Regulation of mitotic cell cycle	REACTOME_Pathways_04.09.2018	0.00	0.00	0.00	0.00	[-1]	Group2	6.98	6.00	[BUB1B, CCNB1, CDC20, CDK1, MAD2L1, NEK2]
73	Cluster 1	Clustered	32	CDC20	FALSE	CDC20				R-HSA:6791312	TP53 Regulates Transcription of Cell Cycle Genes	REACTOME_Pathways_04.09.2018	0.00	0.00	0.00	0.00	[-1]	Group2	6.12	3.00	[CCNB1, CDK1, E2F8]
136	Cluster 1	Clustered	32	CENPF	FALSE	CENPF				R-HSA:69273	Cyclin A/B1/B2 associated events during G2/M transition	REACTOME_Pathways_04.09.2018	0.00	0.00	0.00	0.00	[-1]	Group2	12.00	3.00	[CCNB1, CCNB2, CDK1]
72	Cluster 1	Clustered	32	CDK1	FALSE	CDK1				R-HSA:69478	G2/M DNA replication checkpoint	REACTOME_Pathways_04.09.2018	0.00	0.00	0.00	0.00	[-1]	Group2	60.00	3.00	[CCNB1, CCNB2, CDK1]
199	Cluster 1	Clustered	32	PBK	FALSE	PBK				R-HSA:8854518	AURKA Activation by TPX2	REACTOME_Pathways_04.09.2018	0.00	0.00	0.00	0.00	[-1]	Group2	4.11	3.00	[CDK1, HMMR, NEK2]
molude 2
SUID	MCODE_Cluster	MCODE_Node_Status	MCODE_Score	name	selected	shared name
223	Cluster 2	Clustered	6.611111111	CYP1A2	FALSE	CYP1A2
350	Cluster 2	Clustered	5.785714286	CYP26A1	FALSE	CYP26A1
919	Cluster 2	Clustered	5.785714286	ACSL4	FALSE	ACSL4
279	Cluster 2	Clustered	6.611111111	CYP3A4	FALSE	CYP3A4
308	Cluster 2	Clustered	6.611111111	CYP2B6	FALSE	CYP2B6
212	Cluster 2	Clustered	6	HGF	FALSE	HGF
211	Cluster 2	Clustered	6	SERPINE1	FALSE	SERPINE1
179	Cluster 2	Clustered	6	EGR1	FALSE	EGR1
178	Cluster 2	Clustered	6	FOS	FALSE	FOS
304	Cluster 2	Clustered	6.611111111	CYP4A11	FALSE	CYP4A11
174	Cluster 2	Seed	7	ESR1	FALSE	ESR1
173	Cluster 2	Clustered	6	IGF1	FALSE	IGF1
905	Cluster 2	Clustered	5.785714286	KMO	FALSE	KMO
290	Cluster 2	Clustered	6.611111111	CYP2A6	FALSE	CYP2A6
258	Cluster 2	Clustered	5.785714286	CYP2E1	FALSE	CYP2E1
514	Cluster 2	Clustered	6	SPP1	FALSE	SPP1
molude 2
GOID	GOTerm	Ontology Source	Term PValue	Term PValue Corrected with Bonferroni step down	Group PValue	Group PValue Corrected with Bonferroni step down	GOLevels	GOGroups	% Associated Genes	Nr. Genes	Associated Genes Found
KEGG:00830	Retinol metabolism	KEGG_04.09.2018	0.00	0.00	0.00	0.00	[-1]	Group0	8.96	6.00	[CYP1A2, CYP26A1, CYP2A6, CYP2B6, CYP3A4, CYP4A11]
R-HSA:211897	Cytochrome P450 - arranged by substrate type	REACTOME_Pathways_04.09.2018	0.00	0.00	0.00	0.00	[-1]	Group1	10.61	7.00	[CYP1A2, CYP26A1, CYP2A6, CYP2B6, CYP2E1, CYP3A4, CYP4A11]
R-HSA:211945	Phase I - Functionalization of compounds	REACTOME_Pathways_04.09.2018	0.00	0.00	0.00	0.00	[-1]	Group1	6.54	7.00	[CYP1A2, CYP26A1, CYP2A6, CYP2B6, CYP2E1, CYP3A4, CYP4A11]
KEGG:00590	Arachidonic acid metabolism	KEGG_04.09.2018	0.00	0.00	0.00	0.00	[-1]	Group2	4.76	3.00	[CYP2B6, CYP2E1, CYP4A11]
KEGG:00980	Metabolism of xenobiotics by cytochrome P450	KEGG_04.09.2018	0.00	0.00	0.00	0.00	[-1]	Group2	6.58	5.00	[CYP1A2, CYP2A6, CYP2B6, CYP2E1, CYP3A4]
KEGG:00982	Drug metabolism	KEGG_04.09.2018	0.00	0.00	0.00	0.00	[-1]	Group2	6.94	5.00	[CYP1A2, CYP2A6, CYP2B6, CYP2E1, CYP3A4]
R-HSA:211981	Xenobiotics	REACTOME_Pathways_04.09.2018	0.00	0.00	0.00	0.00	[-1]	Group2	20.83	5.00	[CYP1A2, CYP2A6, CYP2B6, CYP2E1, CYP3A4]
R-HSA:211999	CYP2E1 reactions	REACTOME_Pathways_04.09.2018	0.00	0.00	0.00	0.00	[-1]	Group2	27.27	3.00	[CYP2A6, CYP2B6, CYP2E1]
KEGG:00140	Steroid hormone biosynthesis	KEGG_04.09.2018	0.00	0.00	0.00	0.00	[-1]	Group3	5.08	3.00	[CYP1A2, CYP2E1, CYP3A4]
KEGG:00591	Linoleic acid metabolism	KEGG_04.09.2018	0.00	0.00	0.00	0.00	[-1]	Group3	10.34	3.00	[CYP1A2, CYP2E1, CYP3A4]
KEGG:00980	Metabolism of xenobiotics by cytochrome P450	KEGG_04.09.2018	0.00	0.00	0.00	0.00	[-1]	Group3	6.58	5.00	[CYP1A2, CYP2A6, CYP2B6, CYP2E1, CYP3A4]
KEGG:00982	Drug metabolism	KEGG_04.09.2018	0.00	0.00	0.00	0.00	[-1]	Group3	6.94	5.00	[CYP1A2, CYP2A6, CYP2B6, CYP2E1, CYP3A4]
KEGG:05204	Chemical carcinogenesis	KEGG_04.09.2018	0.00	0.00	0.00	0.00	[-1]	Group3	4.88	4.00	[CYP1A2, CYP2A6, CYP2E1, CYP3A4]
R-HSA:211981	Xenobiotics	REACTOME_Pathways_04.09.2018	0.00	0.00	0.00	0.00	[-1]	Group3	20.83	5.00	[CYP1A2, CYP2A6, CYP2B6, CYP2E1, CYP3A4]
R-HSA:211999	CYP2E1 reactions	REACTOME_Pathways_04.09.2018	0.00	0.00	0.00	0.00	[-1]	Group3	27.27	3.00	[CYP2A6, CYP2B6, CYP2E1]
R-HSA:9018677	Biosynthesis of DHA-derived SPMs	REACTOME_Pathways_04.09.2018	0.00	0.00	0.00	0.00	[-1]	Group3	17.65	3.00	[CYP1A2, CYP2E1, CYP3A4]
R-HSA:9018678	Biosynthesis of specialized proresolving mediators (SPMs)	REACTOME_Pathways_04.09.2018	0.00	0.00	0.00	0.00	[-1]	Group3	15.79	3.00	[CYP1A2, CYP2E1, CYP3A4]
R-HSA:9018682	Biosynthesis of maresins	REACTOME_Pathways_04.09.2018	0.00	0.00	0.00	0.00	[-1]	Group3	37.50	3.00	[CYP1A2, CYP2E1, CYP3A4]
R-HSA:9027307	Biosynthesis of maresin-like SPMs	REACTOME_Pathways_04.09.2018	0.00	0.00	0.00	0.00	[-1]	Group3	50.00	3.00	[CYP1A2, CYP2E1, CYP3A4]
